# Supplementary material
Source: publisher figshare collection journal article supplement (https://frontiersin.figshare.com/ndownloader/files/31085791)
Supplement: Supplementary file [file 31085791]

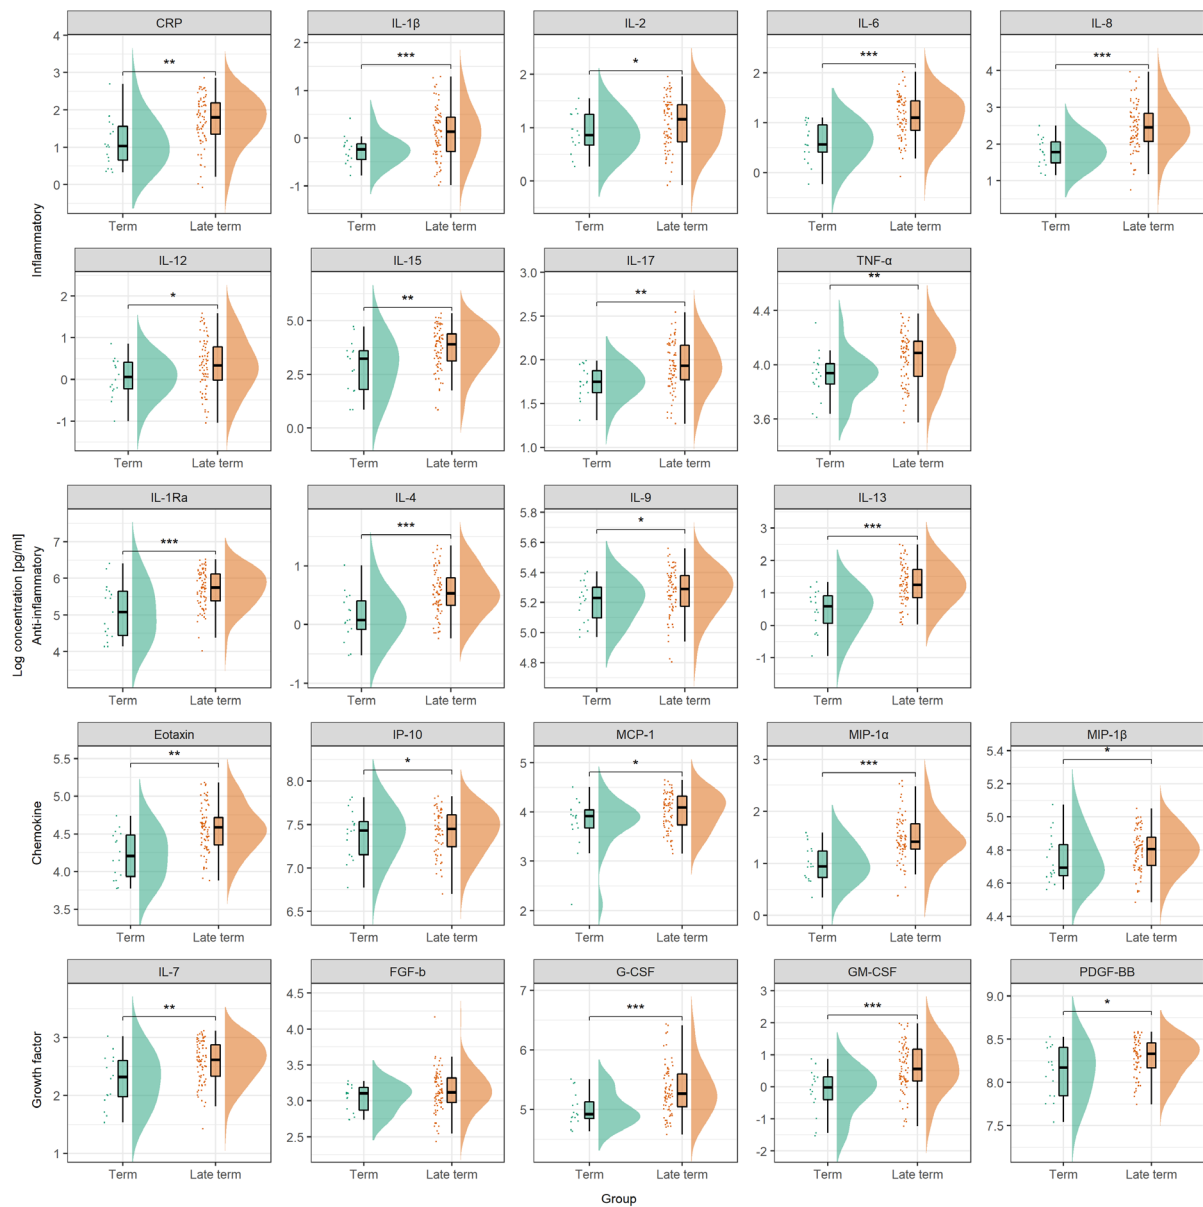

**Supplementary Figure 5. Serum cytokine concentration at term and in late term pregnancies with more than four days to delivery.** Serum cytokine concentrations are compared between term samples taken between week 37<sup>+0</sup> and 40<sup>+3</sup> of pregnancy ( $n = 19$ ) and late term samples taken at approximately week 41<sup>+2</sup> ( $n = 80$ ). Concentrations are shown as individual measurements, median and quartiles as box plot, and as distribution. To enhance readability, values below the 2.5<sup>th</sup> and above the 97.5<sup>th</sup> percentiles are not shown. Statistical significance from Mann-Whitney's U test. CRP is measured in  $\mu\text{g/mL}$ , cytokines in  $\text{pg/mL}$ . \* $P < 0.05$ , \*\* $P < 0.01$ , \*\*\* $P < 0.001$ .
